# Supplementary material for: Protein Profiling of Aedes aegypti Treated with Streptomyces sp. KSF103 Ethyl Acetate Extract Reveals Potential Insecticidal Targets and Metabolic Pathways
Source: MDPI journal article supplement (doi:10.3390/ijms241512398), 2023-08-03

**Supplementary Table S1: Differential regulation of proteins identified by shotgun proteomic analysis with fold change in *Ae. aegypti* larvae and adults after the treatment of *Streptomyces* sp. KSF103. EA extract. The asterisk indicated the significantly expressed proteins with log<sub>2</sub> fold change  $\leq -1.5$  or  $\geq 1.5$ .**

| <b>Larvae</b>      |                                                                      |                    |                                    |
|--------------------|----------------------------------------------------------------------|--------------------|------------------------------------|
| <b>Protein IDs</b> | <b>Protein Name</b>                                                  | <b>Fold Change</b> | <b>Log<sub>2</sub> Fold Change</b> |
| Q1HR69             | Heat shock cognate 70                                                | 16.46              | 4.04*                              |
| Q7KF35             | Ubiquitin-60S ribosomal protein L40                                  | 12.41              | 3.63*                              |
| Q6QNY2             | Actin                                                                | 10.97              | 3.46*                              |
| Q17H12             | ATP synthase subunit beta                                            | 9.00               | 3.17*                              |
| Q178U8             | Fructose-bisphosphate aldolase                                       | 7.04               | 2.82*                              |
| Q175R3             | Calcium-transporting ATPase                                          | 5.65               | 2.50*                              |
| Q17L12             | Ribosomal protein L15                                                | 5.61               | 2.49*                              |
| J9HYM2             | Glyceraldehyde-3-phosphate dehydrogenase                             | 5.18               | 2.37*                              |
| Q17AE9             | AAEL005324-PA                                                        | 4.90               | 2.29*                              |
| Q16RF4             | Paramyosin, long form                                                | 4.57               | 2.19*                              |
| Q16VZ4             | NADH-ubiquinone oxidoreductase 39 kda subunit                        | 3.79               | 1.92*                              |
| Q17A09             | AAEL005435-PB                                                        | 3.40               | 1.77*                              |
| Q1DGF0             | AAEL012697-PA                                                        | 3.21               | 1.68*                              |
| Q0IFX2             | AAEL003933-PA                                                        | 2.88               | 1.52*                              |
| Q1HRQ7             | ATP synthase subunit alpha                                           | 2.86               | 1.52*                              |
| Q17GM7             | Probable citrate synthase 1, mitochondrial                           | 2.38               | 1.25                               |
| A0A6I8TS47         | Basement membrane-specific heparan sulfate proteoglycan core protein | 2.36               | 1.24                               |
| Q16PI3             | Transferrin                                                          | 1.58               | 0.66                               |
| Q17EE8             | Histone H4                                                           | 1.54               | 0.62                               |
| Q16V54             | Serine collagenase 1 precursor, putative                             | 1.33               | 0.41                               |
| Q1HR88             | Elongation factor 1-alpha                                            | 0.83               | -0.27                              |
| Q176H2             | AAEL006368-PA                                                        | 0.70               | -0.52                              |

## Adults

|            |                                                   |       |       |
|------------|---------------------------------------------------|-------|-------|
| Q16LP5     | Pyruvate kinase                                   | 12.34 | 3.62* |
| Q16U81     | AAEL009992-PA                                     | 8.27  | 3.05* |
| Q16UJ3     | 26S protease (S4) regulatory subunit,<br>putative | 5.72  | 2.52* |
| Q16P45     | AAEL011764-PA                                     | 5.46  | 2.45* |
| Q17DD5     | Uncharacterized protein                           | 4.65  | 2.22* |
| Q16PI3     | Transferrin-like domain-containing protein        | 4.63  | 2.21* |
| Q174D6     | Dihydrolipoyl dehydrogenase                       | 3.96  | 1.99* |
| Q17AK0     | AAEL005269-PA                                     | 3.94  | 1.98* |
| Q176D3     | Uncharacterized protein                           | 3.92  | 1.97* |
| Q16JD9     | AAEL013367-PA                                     | 3.78  | 1.92* |
| Q16MB4     | Nucleoside diphosphate kinase                     | 3.69  | 1.89* |
| Q1HR21     | ATP synthase subunit d, mitochondrial             | 3.14  | 1.65* |
| A0A6I8TLV1 | 40S ribosomal protein SA                          | 3.10  | 1.63* |
| Q16XK3     | ATP synthase subunit gamma                        | 3.00  | 1.59* |
| Q0IG02     | Acetyl-CoA hydrolase                              | 2.94  | 1.55* |
| Q16XT3     | AAEL008773-PA                                     | 2.82  | 1.50* |
| Q1HRR9     | Peptidyl-prolyl cis-trans isomerase               | 2.75  | 1.46  |
| Q6QNY2     | Pupal-specific flight muscle actin                | 2.68  | 1.42  |
| Q17H12     | ATP synthase subunit beta                         | 2.67  | 1.42  |
| Q1HQJ0     | 60S ribosomal protein L4                          | 2.62  | 1.39  |
| Q16EL0     | AAEL015116-PA                                     | 2.55  | 1.35  |
| Q17BX4     | Uncharacterized protein                           | 2.53  | 1.34  |
| Q1HRH7     | Catalase                                          | 2.50  | 1.32  |
| Q16P06     | AAEL011802-PA                                     | 2.49  | 1.31  |
| Q1HR13     | Prohibitin                                        | 2.42  | 1.27  |
| Q16HQ0     | AAEL000419-PA                                     | 2.36  | 1.24  |

|            |                                                                      |      |      |
|------------|----------------------------------------------------------------------|------|------|
| Q17P76     | Fructose-bisphosphate aldolase                                       | 2.30 | 1.20 |
| J9HT37     | Phosphotransferase                                                   | 2.25 | 1.17 |
| Q0IFX2     | AAEL003933-PA                                                        | 2.19 | 1.13 |
| Q176Z3     | AAEL006222-PA                                                        | 2.13 | 1.09 |
| A0A6I8U5Z1 | Uncharacterized protein                                              | 2.12 | 1.09 |
| Q1HRT9     | 40S ribosomal protein S5                                             | 2.09 | 1.07 |
| A0A6I8T8L2 | Ubiquitin-like domain-containing protein                             | 2.09 | 1.06 |
| Q16RV8     | AAEL010833-PA                                                        | 2.08 | 1.06 |
| Q17NB9     | AAEL000749-PA                                                        | 2.04 | 1.03 |
| A0A6I8T7P8 | Cytochrome c oxidase subunit 4                                       | 2.00 | 1.00 |
| Q1HR77     | Ribosomal protein L3                                                 | 1.99 | 0.99 |
| Q17D16     | AAEL004369-PA                                                        | 1.98 | 0.98 |
| Q17HE2     | AAEL002720-PA                                                        | 1.95 | 0.97 |
| Q1HR32     | 60S ribosomal protein L8                                             | 1.92 | 0.94 |
| Q177P3     | Phosphoglycerate mutase                                              | 1.91 | 0.93 |
| Q5MM88     | Cytochrome b-c1 complex subunit 7                                    | 1.87 | 0.90 |
| Q16SE5     | 1,4-alpha-glucan branching enzyme                                    | 1.85 | 0.89 |
| Q1HRL6     | NADH-ubiquinone oxidoreductase 24 kda subunit                        | 1.83 | 0.87 |
| A0A6I8U4L8 | PDZ domain-containing protein                                        | 1.81 | 0.86 |
| A0A6I8TLR5 | NADH dehydrogenase [ubiquinone] iron-sulfur protein 3, mitochondrial | 1.79 | 0.84 |
| A0A6I8TII1 | Glycogen debranching enzyme                                          | 1.77 | 0.82 |
| Q16PR4     | AAEL011551-PA                                                        | 1.75 | 0.80 |
| Q17A27     | Multifunctional fusion protein                                       | 1.73 | 0.79 |

|            |                                                                 |      |      |
|------------|-----------------------------------------------------------------|------|------|
| Q1HQU4     | Saccharopine dehydrogenase domain-containing protein            | 1.72 | 0.78 |
| Q17A03     | Alpha-galactosidase                                             | 1.72 | 0.78 |
| A0A6I8TGV5 | Uncharacterized protein                                         | 1.71 | 0.78 |
| Q16IU1     | AAEL013559-PA                                                   | 1.71 | 0.78 |
| Q1HRQ7     | ATP synthase subunit alpha                                      | 1.71 | 0.77 |
| A0A0P6IYG4 | ADP/ATP translocase                                             | 1.70 | 0.77 |
| Q17G59     | AAEL003194-PA                                                   | 1.70 | 0.76 |
| A0A6I8T9C7 | ATP-citrate synthase                                            | 1.66 | 0.73 |
| Q17CT0     | Transketolase-like pyrimidine-binding domain-containing protein | 1.65 | 0.72 |
| O16109     | V-type proton ATPase catalytic subunit A                        | 1.62 | 0.69 |
| Q17HW3     | Triosephosphate isomerase                                       | 1.60 | 0.68 |
| Q17B69     | AAEL005054-PA                                                   | 1.59 | 0.66 |
| Q1HQUI0    | 39S mitochondrial ribosomal protein L28                         | 1.58 | 0.66 |
| Q16YD0     | Acyl-coenzyme A oxidase                                         | 1.57 | 0.65 |
| A0A1S4FHF8 | Malate dehydrogenase                                            | 1.57 | 0.65 |
| Q9BME7     | Elongation factor 2                                             | 1.55 | 0.64 |
| Q175A4     | oxoglutarate dehydrogenase (succinyl-transferring)              | 1.54 | 0.62 |
| Q17A09     | AAEL005435-PA                                                   | 1.54 | 0.62 |
| Q16LR5     | NADH-ubiquinone oxidoreductase 75 kDa subunit, mitochondrial    | 1.53 | 0.62 |
| Q1HRQ9     | 40S ribosomal protein S8                                        | 1.52 | 0.60 |
| Q16YC2     | AAEL008607-PA                                                   | 1.49 | 0.57 |
| A0A1S4EXR8 | Malic enzyme                                                    | 1.46 | 0.55 |
| Q179J9     | ATP synthase subunit b                                          | 1.45 | 0.54 |

|            |                                                                                      |      |      |
|------------|--------------------------------------------------------------------------------------|------|------|
| Q9XYC8     | Vacuolar proton pump subunit B                                                       | 1.45 | 0.53 |
| Q16GA3     | AAEL014449-PA                                                                        | 1.42 | 0.51 |
| A0A6I8T9G2 | Dihydrolipoamide acetyltransferase<br>component of pyruvate dehydrogenase<br>complex | 1.41 | 0.50 |
| Q16TI5     | NADH dehydrogenase [ubiquinone] 1 beta<br>subcomplex subunit 9                       | 1.41 | 0.50 |
| Q1HR08     | Mitochondrial cytochrome c1                                                          | 1.41 | 0.49 |
| Q1HR38     | ATP synthase subunit                                                                 | 1.41 | 0.49 |
| Q16Q68     | Complex I-49kD                                                                       | 1.39 | 0.47 |
| A0A1S4FIY1 | Malate dehydrogenase, mitochondrial                                                  | 1.39 | 0.47 |
| A0A6I8T6L7 | Twitchin                                                                             | 1.39 | 0.47 |
| Q17DN4     | AAEL004112-PA                                                                        | 1.37 | 0.45 |
| Q17KS3     | Glycerol-3-phosphate dehydrogenase<br>[NAD(+)]                                       | 1.36 | 0.45 |
| Q1HR81     | 60S ribosomal protein L7                                                             | 1.36 | 0.44 |
| Q17G27     | AAEL003235-PA                                                                        | 1.35 | 0.44 |
| Q1HRD1     | C-Type Lectin                                                                        | 1.35 | 0.43 |
| Q16TK2     | Myofilin                                                                             | 1.31 | 0.39 |
| Q16IX7     | AAEL013515-PA                                                                        | 1.30 | 0.37 |
| Q17IM5     | Uncharacterized protein                                                              | 1.29 | 0.36 |
| Q16XK7     | Uncharacterized protein                                                              | 1.26 | 0.34 |
| A0A6I8TFZ7 | fumarate hydratase                                                                   | 1.26 | 0.33 |
| A0A1S4FPC9 | Tox-SGS domain-containing protein                                                    | 1.26 | 0.33 |
| Q17M16     | AAEL001194-PA                                                                        | 1.25 | 0.32 |
| Q17NG8     | Alpha-1,4 glucan phosphorylase                                                       | 1.24 | 0.31 |
| A0A6I8TNR3 | Proline dehydrogenase                                                                | 1.23 | 0.30 |

|            |                                                                          |      |      |
|------------|--------------------------------------------------------------------------|------|------|
| Q16KR4     | Aconitate hydratase, mitochondrial                                       | 1.22 | 0.29 |
| Q172T4     | AAEL007306-PA                                                            | 1.22 | 0.28 |
| Q17GL0     | AAEL002978-PA                                                            | 1.21 | 0.28 |
| J9HXZ8     | AAEL001061-PC                                                            | 1.21 | 0.28 |
| Q17H80     | AAEL002759-PA                                                            | 1.20 | 0.26 |
| Q0IED0     | Isocitrate dehydrogenase-like domain-containing protein                  | 1.19 | 0.25 |
| A0A6R5IQX6 | Uncharacterized protein                                                  | 1.18 | 0.24 |
| Q17H31     | AAEL002776-PA                                                            | 1.17 | 0.23 |
| Q17N85     | Ubiquitin-activating enzyme E1 C-terminal domain-containing protein      | 1.16 | 0.22 |
| A0A6I8TJS2 | Succinate dehydrogenase [ubiquinone] flavoprotein subunit, mitochondrial | 1.16 | 0.21 |
| Q1HQN2     | Malic enzyme                                                             | 1.14 | 0.18 |
| Q16V52     | Pyruvate carboxylase                                                     | 1.12 | 0.17 |
| Q1HRJ0     | Cytochrome c oxidase subunit 5A, mitochondrial                           | 1.12 | 0.16 |
| Q16K65     | Proteasome subunit alpha type                                            | 1.12 | 0.16 |
| A0A6I8U7E0 | acetyl-CoA carboxylase                                                   | 1.10 | 0.14 |
| J9HYM2     | Glyceraldehyde-3-phosphate dehydrogenase                                 | 1.10 | 0.13 |
| Q16LN3     | Aspartate aminotransferase                                               | 1.09 | 0.12 |
| Q17AE9     | AAEL005324-PA                                                            | 1.08 | 0.11 |
| Q1HR24     | 40S ribosomal protein S14                                                | 1.08 | 0.11 |
| Q1HRE7     | Bacteria-responsive protein 1 AgBR1                                      | 1.06 | 0.08 |
| A0A6I8T8S4 | Uncharacterized protein                                                  | 1.06 | 0.08 |
| Q16UT3     | AAEL009795-PA                                                            | 1.03 | 0.04 |
| Q1HQQ9     | Hypothetical conserved protein                                           | 1.03 | 0.04 |

|            |                                                          |      |       |
|------------|----------------------------------------------------------|------|-------|
| Q17GM7     | Probable citrate synthase 1, mitochondrial               | 1.02 | 0.02  |
| Q16EQ1     | Uncharacterized protein                                  | 1.01 | 0.02  |
| Q16Y94     | Uncharacterized protein                                  | 1.01 | 0.02  |
| A0A6I8TQI9 | EGF-like domain-containing protein                       | 1.01 | 0.01  |
| Q0IEU5     | AAEL008006-PA                                            | 1.00 | 0.01  |
| Q16G96     | AAEL014456-PA                                            | 0.99 | -0.01 |
| Q178J6     | Spectrin beta chain                                      | 0.99 | -0.02 |
| Q16QR2     | Peptidase M20 dimerisation domain-containing protein     | 0.98 | -0.03 |
| Q1HR83     | peptidylprolyl isomerase                                 | 0.96 | -0.06 |
| Q17HP8     | Peptidase S1 domain-containing protein                   | 0.95 | -0.07 |
| Q1HQT6     | Vacuolar ATP synthase subunit E                          | 0.94 | -0.09 |
| Q17EW2     | AAEL003658-PA                                            | 0.92 | -0.12 |
| Q17B17     | AAEL005129-PA                                            | 0.90 | -0.15 |
| Q17PZ2     | Complex III subunit 9                                    | 0.89 | -0.16 |
| Q178U9     | Fructose-bisphosphate aldolase                           | 0.87 | -0.20 |
| Q17P80     | Isocitrate dehydrogenase [NAD] subunit, mitochondrial    | 0.82 | -0.28 |
| Q16J86     | Catalase                                                 | 0.81 | -0.30 |
| A0A6I8U458 | Myosin heavy chain, muscle                               | 0.78 | -0.35 |
| Q16Z50     | Calponin                                                 | 0.77 | -0.37 |
| A0A0N8ERX8 | Putative ubiquinone oxidoreductase ndufs8/23 kDa subunit | 0.74 | -0.44 |
| Q1HR10     | Phosphoglycerate dehydrogenase                           | 0.71 | -0.49 |
| J9EA44     | AAEL007633-PB                                            | 0.70 | -0.51 |
| Q0IGD8     | Uncharacterized protein                                  | 0.69 | -0.53 |
| A0A6I8TFM2 | Integrin alpha-2 domain-containing protein               | 0.68 | -0.55 |

|        |                                    |      |        |
|--------|------------------------------------|------|--------|
| Q16YQ8 | Cystathionine beta-synthase        | 0.67 | -0.57  |
| Q16PB5 | Heat shock protein 83              | 0.65 | -0.61  |
| Q173T1 | Pyrroline-5-carboxylate reductase  | 0.65 | -0.62  |
| Q16W59 | AAEL009324-PA                      | 0.65 | -0.62  |
| Q17E81 | Glycerol-3-phosphate dehydrogenase | 0.64 | -0.65  |
| Q0IGD5 | Uncharacterized protein            | 0.36 | -1.46  |
| Q0IFA5 | 40S ribosomal protein S3a          | 0.32 | -1.63* |
| Q16UK8 | Alanine transaminase               | 0.29 | -1.79* |

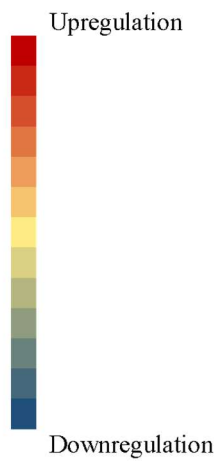

Supplement: s1 [file s1]
